# Supplementary material for: Asthma exacerbations and eosinophilia in the UK Biobank: a genome-wide association study
Source: PubMed Central journal article supplement — ERJ Open Res. 2024 Jan 8;10(1):00566-2023. doi: 10.1183/23120541.00566-2023 (PMC10772900; doi:10.1183/23120541.00566-2023), 2024-01-08
Supplement: 00566-2023.SUPPLEMENT.pdf [file 00566-2023.SUPPLEMENT.pdf]

Figure S1: Quantile-quantile plot of genome-wide associations of asthma exacerbations within asthmatics

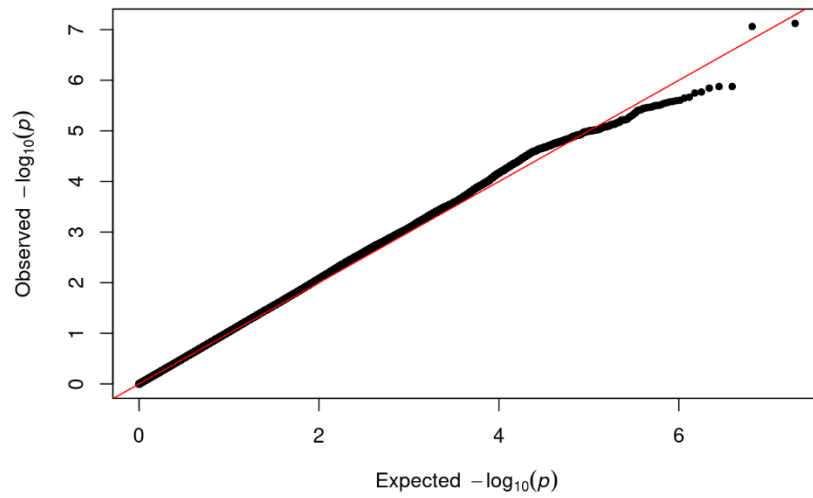

In this plot, observed  $-\log_{10} p$  values are plotted on the y axis, while expected  $-\log_{10} p$  values are plotted on the x-axis, representing the null-hypothesis. The genomic control ratio ( $\lambda$ ) was 1.043, indicating limited p-value inflations resulting from systematic errors such as population stratification.

Figure S2 : Fine-mapping for the two replicated loci.

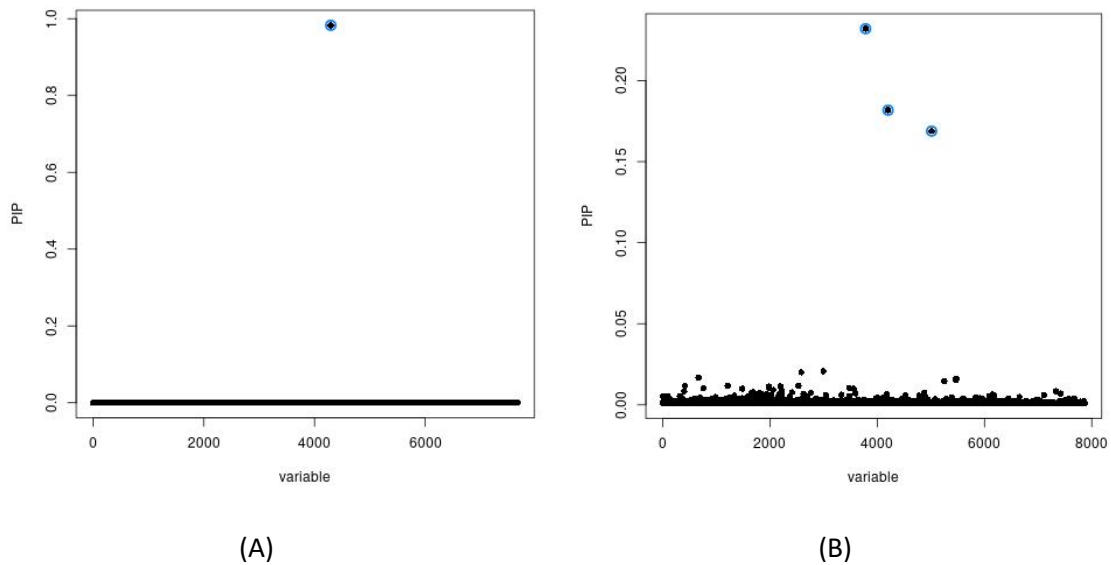

Credible sets for (A) rs34643691 and (B) rs149721630 identified using susie fine mapping. Variants across each region are ordered by position along the chromosome (x axis) and the y-axis gives the posterior inclusion probability (PIP) of each variant. The higher the PIP the more likely the variant is to be the causal variant. SNPs circled in blue represent those belonging to the 95% credible sets. Both sentinel SNPs identified by our GWAS had the highest PIP within their identified credible sets within the regions.

Figure S3: Quantile-quantile plot of genome-wide associations of SNP by eosinophilia interaction effects on asthma exacerbations within asthmatics

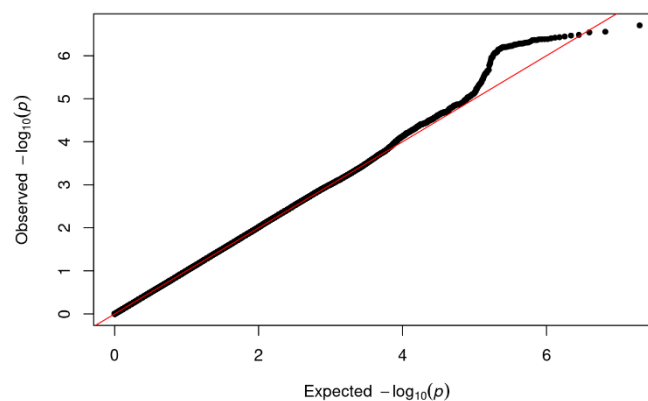

In this plot, observed  $-\log_{10} p$  values are plotted on the y axis, while expected  $-\log_{10} p$  values are plotted on the x-axis, representing the null-hypothesis. The genomic control ratio ( $\lambda$ ) was 1.001, indicating limited p-value inflations resulting from potential systematic errors such as population stratification.



Table S3

| SNP         | Chromosome | pos (GRCh37) | effect allele | non-effect allele | frequency of effect allele | beta     | se       | p        | Beta (sensitivity) | Se (sensitivity) | P (sensitivity) |
|-------------|------------|--------------|---------------|-------------------|----------------------------|----------|----------|----------|--------------------|------------------|-----------------|
| rs34336667  | 1          | 177780414    | AT            | A                 | 0.265062                   | 0.091554 | 0.018991 | 1.43E-06 | 0.082209           | 0.027276         | 0.002579        |
| rs3806362   | 1          | 200589810    | T             | C                 | 0.081828                   | 0.128766 | 0.027412 | 2.63E-06 | 0.08664            | 0.039365         | 0.027741        |
| rs115568045 | 1          | 209310112    | G             | A                 | 0.022435                   | -0.26182 | 0.056776 | 4.00E-06 | -0.21122           | 0.083138         | 0.011066        |
| rs5833288   | 2          | 109065481    | CA            | C                 | 0.403177                   | 0.070784 | 0.015474 | 4.78E-06 | 0.093651           | 0.022239         | 2.54E-05        |
| rs2077471   | 2          | 109126070    | G             | A                 | 0.448662                   | 0.070204 | 0.015303 | 4.49E-06 | 0.092709           | 0.02203          | 2.57E-05        |
| rs139774713 | 5          | 98065239     | G             | A                 | 0.018811                   | 0.248577 | 0.054438 | 4.97E-06 | 0.22314            | 0.076495         | 0.003533        |
| rs219997    | 6          | 12211766     | T             | C                 | 0.235934                   | -0.08329 | 0.018131 | 4.36E-06 | -0.03414           | 0.026042         | 1.90E-01        |
| rs219999    | 6          | 12211902     | A             | G                 | 0.236263                   | -0.08347 | 0.018086 | 3.93E-06 | -0.03362           | 0.025973         | 0.195491        |
| rs149721630 | 7          | 48542408     | C             | T                 | 0.012403                   | -0.35835 | 0.077318 | 3.57E-06 | -0.35628           | 0.116836         | 0.002293        |

|             |    |           |   |   |          |          |          |          |          |          |          |
|-------------|----|-----------|---|---|----------|----------|----------|----------|----------|----------|----------|
| rs10123706  | 9  | 137096238 | G | C | 0.416947 | 0.072494 | 0.015407 | 2.54E-06 | 0.075127 | 0.022187 | 0.000709 |
| rs10123726  | 9  | 137096354 | G | C | 0.417078 | 0.072569 | 0.015407 | 2.47E-06 | 0.07463  | 0.022187 | 0.000769 |
| rs10123728  | 9  | 137096383 | G | C | 0.417081 | 0.072883 | 0.015408 | 2.24E-06 | 0.075141 | 0.022189 | 0.000708 |
| rs10118100  | 9  | 137096413 | T | G | 0.41715  | 0.072999 | 0.015408 | 2.16E-06 | 0.075402 | 0.022188 | 0.000678 |
| rs7023064   | 9  | 137096951 | A | G | 0.407699 | 0.071736 | 0.015486 | 3.62E-06 | 0.06749  | 0.022305 | 0.002481 |
| rs7855448   | 9  | 137098002 | A | G | 0.407631 | 0.072343 | 0.015499 | 3.05E-06 | 0.068424 | 0.022323 | 0.002175 |
| rs117027695 | 10 | 54425901  | T | C | 0.011521 | 0.32054  | 0.069007 | 3.40E-06 | 0.306042 | 0.095629 | 0.001373 |
| rs7159345   | 14 | 43457114  | C | A | 0.100752 | 0.114664 | 0.024829 | 3.87E-06 | 0.129778 | 0.035131 | 2.21E-04 |
| rs113932584 | 14 | 43457848  | G | T | 0.100713 | 0.114811 | 0.024833 | 3.78E-06 | 0.131596 | 0.035119 | 0.000179 |
| rs1449836   | 14 | 43463396  | T | G | 0.067293 | 0.159136 | 0.02959  | 7.53E-08 | 0.162851 | 0.041765 | 9.65E-05 |
| rs111821465 | 14 | 43503967  | C | T | 0.016421 | 0.263829 | 0.056658 | 3.22E-06 | 0.273433 | 0.078011 | 0.000457 |
| rs59429452  | 14 | 43504463  | T | G | 0.016423 | 0.262823 | 0.056654 | 3.50E-06 | 0.273281 | 0.077995 | 0.000459 |

|                  |    |          |   |    |          |          |          |          |          |          |          |
|------------------|----|----------|---|----|----------|----------|----------|----------|----------|----------|----------|
| 14:43505428_TA_T | 14 | 43505428 | T | TA | 0.015663 | 0.280799 | 0.058077 | 1.33E-06 | 0.276492 | 0.080195 | 0.000565 |
| rs111469671      | 14 | 43508371 | T | C  | 0.016343 | 0.266291 | 0.056727 | 2.68E-06 | 0.278813 | 0.077991 | 3.50E-04 |
| rs8015236        | 14 | 43510507 | C | T  | 0.016405 | 0.264012 | 0.056639 | 3.14E-06 | 0.274407 | 0.077962 | 0.000432 |
| rs8014358        | 14 | 43510518 | T | G  | 0.016424 | 0.262899 | 0.056621 | 3.43E-06 | 0.273016 | 0.077958 | 0.000462 |
| rs73332466       | 14 | 43511670 | T | A  | 0.016417 | 0.263175 | 0.056626 | 3.36E-06 | 0.273702 | 0.077952 | 0.000446 |
| rs73332487       | 14 | 43514508 | A | C  | 0.016417 | 0.2638   | 0.056598 | 3.15E-06 | 0.27348  | 0.077928 | 0.000449 |
| rs73332500       | 14 | 43517217 | G | A  | 0.016775 | 0.267605 | 0.05592  | 1.71E-06 | 0.275682 | 0.077005 | 0.000344 |
| rs772417432      | 14 | 43527515 | C | CT | 0.028771 | 0.218867 | 0.046714 | 2.80E-06 | 0.290661 | 0.063521 | 4.74E-06 |
| rs111798843      | 14 | 43531913 | C | G  | 0.016284 | 0.271463 | 0.056829 | 1.78E-06 | 0.28313  | 0.078094 | 0.000288 |
| rs143376019      | 14 | 43538506 | T | C  | 0.016304 | 0.266051 | 0.056864 | 2.89E-06 | 0.284993 | 0.078009 | 0.000259 |
| rs34643691       | 15 | 88374252 | T | C  | 0.010305 | 0.380397 | 0.071069 | 8.68E-08 | 0.291286 | 0.099587 | 0.003445 |
| rs62077755       | 17 | 47560440 | C | A  | 0.028413 | 0.212136 | 0.043872 | 1.33E-06 | 0.145724 | 0.062827 | 0.020371 |
